# Supplementary material for: Synthesis and optical properties of lead-free white-light-emitting single-phase complexes
Source: Royal Society of Chemistry journal article supplement (doi:10.1039/d5ce00238a), 2025-01-01
Supplement: d5ce00238a1.pdf [file d5ce00238a1.pdf]

## Supplementary Information

### Synthesis and optical properties of lead-free single-phase white-light-emitting complexes

Yihan Li<sup>a</sup>, Guangcan Tan<sup>a</sup>, Xinyi Zhang<sup>a</sup>, Qingrui Ma<sup>a</sup>, Dawei Zhang<sup>a</sup>, and Honge Wu<sup>a\*</sup>

*School of Chemical and Environmental Engineering, Anhui Polytechnic University, Wuhu 241000, China*

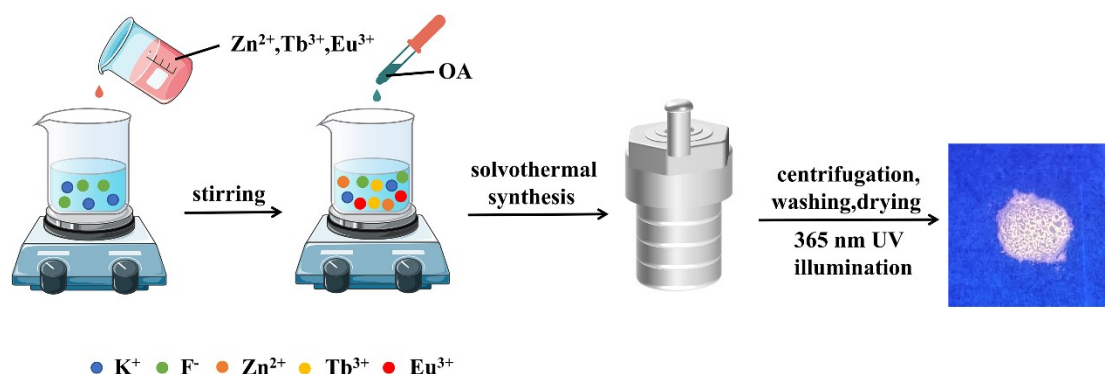

Fig.S1. The schematic diagram for synthesis of the KZnF<sub>3</sub>: Eu<sup>3+</sup>, Tb<sup>3+</sup>/OA complexes

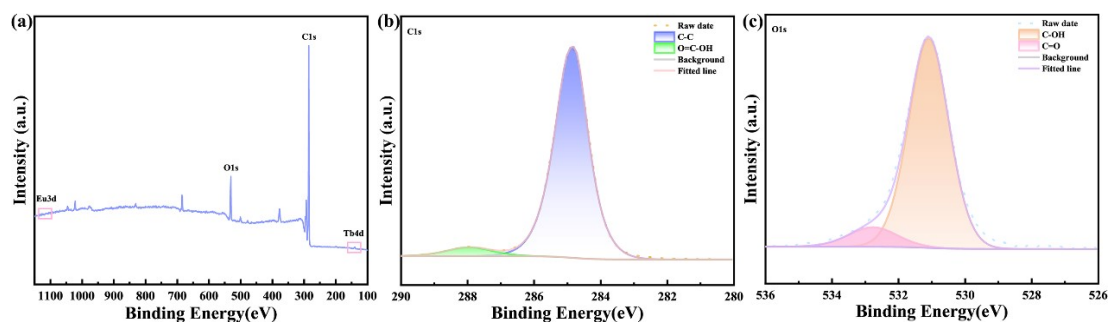

Fig. S2. (a) XPS survey spectrum of KZnF<sub>3</sub>: Eu<sup>3+</sup>, Tb<sup>3+</sup>/OA complexes and the high-resolution spectrum of (b) C 1s and (c) O 1s

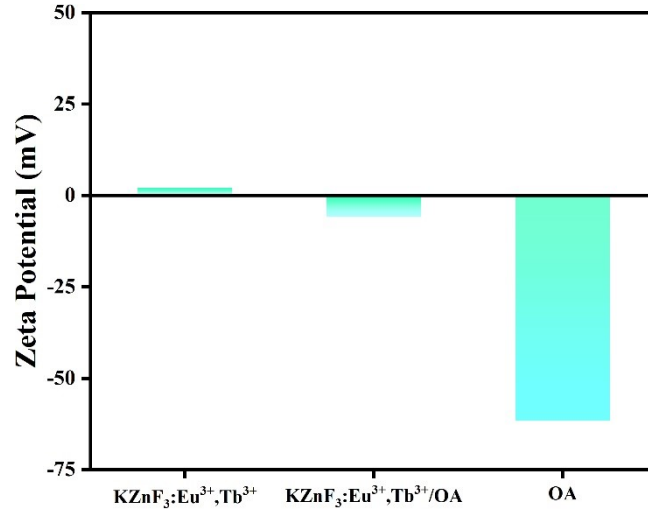

Fig. S3. The zeta potentials of the KZnF<sub>3</sub>: Eu<sup>3+</sup>, Tb<sup>3+</sup>, KZnF<sub>3</sub>: Eu<sup>3+</sup>, Tb<sup>3+</sup>/OA and OA.

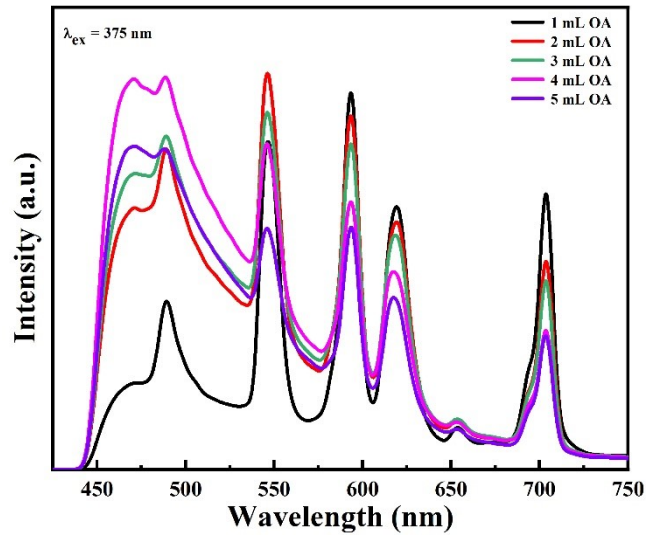

Fig. S4. PL spectra of KZnF<sub>3</sub>: Eu<sup>3+</sup>, Tb<sup>3+</sup>/OA complexes with varying OA content.

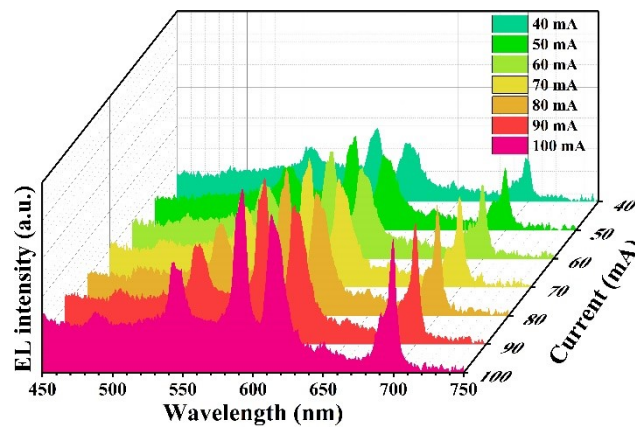

Fig. S5. EL spectra of KZnF<sub>3</sub>: Eu<sup>3+</sup>, Tb<sup>3+</sup>/OA complexes under the different forward-bias currents.

Table S1 CIE color coordinates of KZnF<sub>3</sub>: Eu<sup>3+</sup>, Tb<sup>3+</sup>/OA complexes under the different forward-bias currents

| Currents<br>(mA)         | 40            | 50            | 60            | 70            | 80            | 90            | 100           |
|--------------------------|---------------|---------------|---------------|---------------|---------------|---------------|---------------|
| CIE color<br>coordinates | (0.353,0.369) | (0.356,0.364) | (0.358,0.361) | (0.359,0.355) | (0.364,0.349) | (0.363,0.343) | (0.363,0.339) |
